# Supplementary material for: Transmembrane helix hydrophobicity is an energetic barrier during the retrotranslocation of integral membrane ERAD substrates
Source: PubMed Central journal article supplement — Mol Biol Cell. 2017 Jul 15;28(15):2076–90. doi: 10.1091/mbc.E17-03-0184 (PMC5509421; doi:10.1091/mbc.e17-03-0184), 2017-07-15
Supplement: supp_E17-03-0184v1_CombinedSupMats.pdf [file supp_E17-03-0184v1_CombinedSupMats.pdf]

# Supplemental Materials

*Molecular Biology of the Cell*

Guerriero et al.

Supplemental Figure 1  
Guerriero et al.

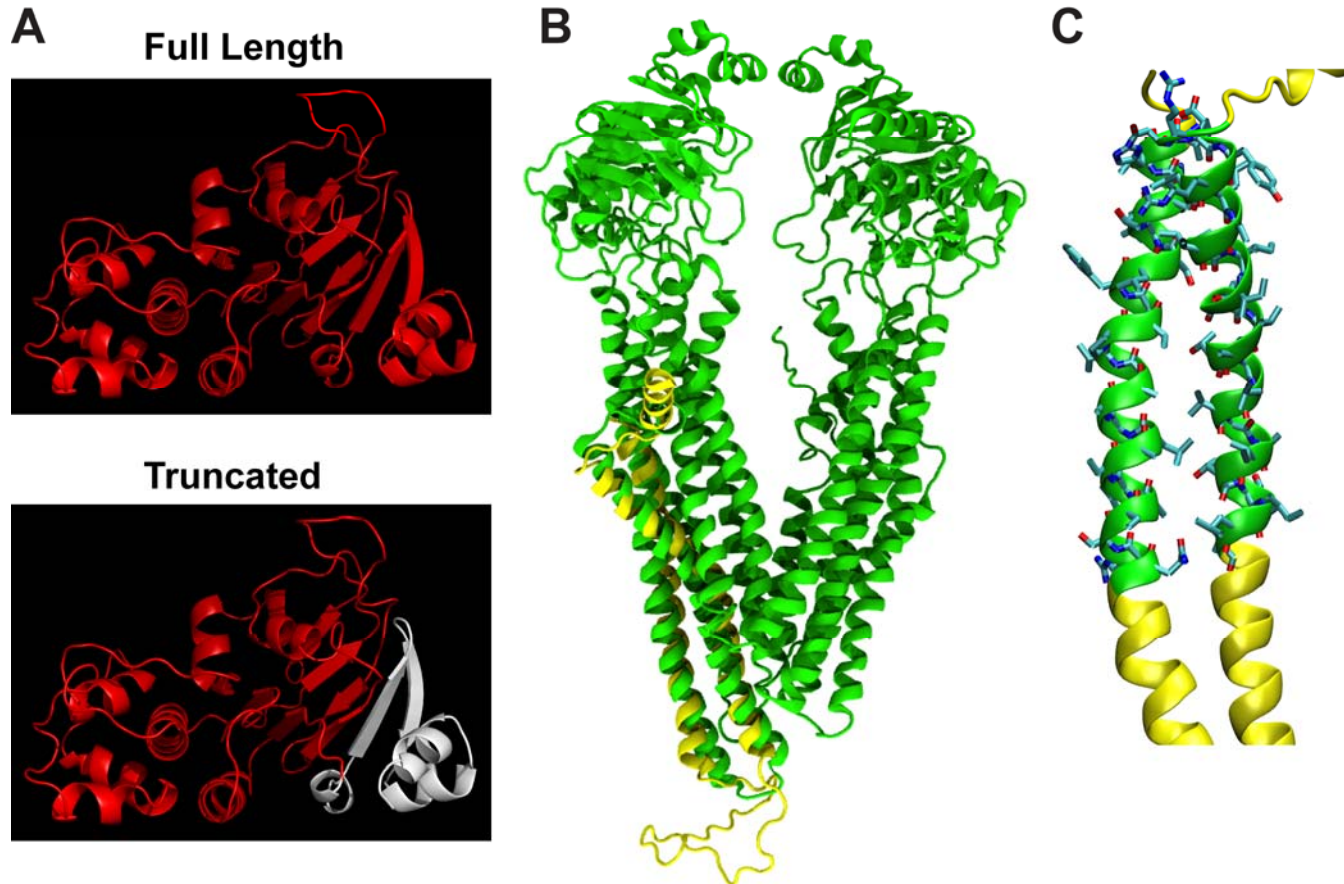

**Supplemental Figure 1. Homology models of Ste6p TMH1 and 2 and NBD2**

A) Homology model of Ste6p NBD2, a.a. 1047-1290, using mouse p-glycoprotein, NBD2, 4M1M. The 42 amino acid truncation, a.a. 1249-1290, is colored white for the truncated view (bottom). B) Superimposition of Ste6p TMH1 and 2 (highlighted yellow) on the structure of mouse p-glycoprotein (green), 3G5U, via a homology model. C) Magnified view of

Ste6p helix 1 and 2 (yellow), where TMH1, a.a. 21-48 and TMH2, 73-99 are highlighted in green, and these chains are displayed. The image was rendered using visual molecular dynamics (VMD).

Supplemental Figure 2  
Guerrero et al.

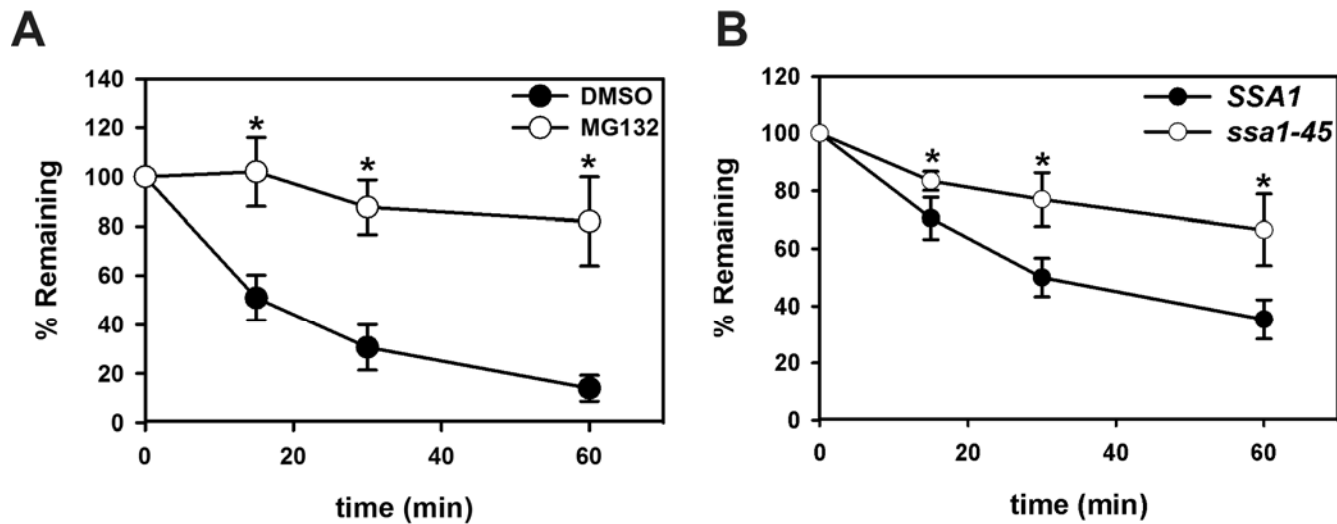

**Supplemental Figure 2. The Chimera A\* degradation requirements are similar regardless of high expression or low expression systems**

A) Yeast deleted for the drug efflux pump, Pdr5p, were transformed with a Chimera A\* expression vector in which protein production is under the control of the PGK promoter. Yeast were then subjected to a cycloheximide chase analysis following a 20 min preincubation with DMSO (closed circles) or 100  $\mu$ M MG132 (open circles) for the indicated times. Samples were processed as described in the Materials and Methods. B) Degradation of Chimera A\* under the control of the PGK promoter was examined in SSA1 and ssa1-45 yeast at 37 °C following a 20 min preincubation at that temperature. Data represent the means from at least 3 independent experiments  $\pm$  SE. \*,  $p < 0.04$  for *pdr5* $\Delta$  and  $p < 0.02$  for *ssa1-45*.

Supplemental Table 1 Computational values

| <b>Parameter</b>      | <b>Value</b>               |
|-----------------------|----------------------------|
| force field           | PARSE                      |
| counter ions          | $\pm 1 e $ , 0.1 M, 2.0 Å  |
| temperature           | 298.15 K                   |
| grid dimensions       | 129×129×129                |
| coarse grid size      | 300×300×300 Å <sup>3</sup> |
| fine grid size        | 50×50×50 Å <sup>3</sup>    |
| protein dielectric    | 2                          |
| membrane dielectric   | 2                          |
| headgroup dielectric  | 80                         |
| solvent dielectric    | 80                         |
| hydrophobic thickness | 28.5 Å                     |

|                          |                           |
|--------------------------|---------------------------|
| headgroup thickness      | 8.0 Å                     |
| grid center              | origin                    |
| solution method          | npbe                      |
| boundary condition       | zero                      |
| charge model             | spl2                      |
| surface model            | mol                       |
| spline width             | 0.3 Å                     |
| solvent probe radius     | 1.4 Å                     |
| surface sphere density   | 10 Å <sup>-2</sup>        |
| nonpolar surface tension | 23 cal/mol/Å <sup>2</sup> |

Supplemental Table 2 Computed free energies for insertion for Chimera A\* variants

| TMH1 sequence                | % retrotranslocation | Phenomenological scale | Physics-based model | Physics-based model (zeroed) |
|------------------------------|----------------------|------------------------|---------------------|------------------------------|
| RNDYRLLMIMIIGTVATGLVPAITSILT | 35.6                 | 0.31                   | -48.6               | 0                            |
| GGPGAAAALALALALALALAAAAAGGPG | 36.4                 | -0.19                  | -46.1               | 2.5                          |
| GGPGNAAAALLLLLLLLLLLAAANGGPG | 31.1                 | -1.07                  | -51.3               | -2.7                         |
| RNDYRLLMIMIIALVALALVLAITSILT | 21.9                 | -4.38                  | -65.4               | -16.8                        |
| GGPGLLLLLLLLLLLLLLLLLLLGGPG  | 22.3                 | -7.15                  | -62.0               | -13.4                        |

\* All energies are reported as kcal/mol

**Supplemental Table 3 Yeast strains used in this study**

| <b>Strain</b>                                           | <b>Genotype</b>                                                                                                                                                                                       | <b>Reference/Source</b>          |
|---------------------------------------------------------|-------------------------------------------------------------------------------------------------------------------------------------------------------------------------------------------------------|----------------------------------|
| BY4742                                                  | <i>MAT<math>\alpha</math>, his3<math>\Delta</math>1, leu2<math>\Delta</math>0, lys2<math>\Delta</math>0 ura3<math>\Delta</math>3</i>                                                                  | (Winzeler <i>et al.</i> , 1999)  |
| <i>pdr5<math>\Delta</math></i>                          | <i>MAT<math>\alpha</math>, his3<math>\Delta</math>1, leu2<math>\Delta</math>0, ura3<math>\Delta</math>3 pdr5<math>\Delta</math>::KanMX</i>                                                            | (Winzeler <i>et al.</i> , 1999)  |
| <i>pep4<math>\Delta</math></i>                          | <i>MAT<math>\alpha</math>, his3<math>\Delta</math>1, leu2<math>\Delta</math>0, ura3<math>\Delta</math>3 pep4<math>\Delta</math>::KanMX</i>                                                            | (Latterich <i>et al.</i> , 1995) |
| <i>pdr5<math>\Delta</math> pep4<math>\Delta</math></i>  | <i>MAT<math>\alpha</math>, met15<math>\Delta</math>0, his3<math>\Delta</math>1, leu2<math>\Delta</math>0, ura3<math>\Delta</math>3 pdr5<math>\Delta</math>::KanMX, pep4<math>\Delta</math>::KanMX</i> | This lab                         |
| SSA1                                                    | <i>MAT<math>\alpha</math>, his3-11,15, leu2-3,112, ura3-52. trp1-<math>\Delta</math>1, lys2, ssa2-1(LEU2), ssa3-1(TRP1), ssa4-2(LYS2)</i>                                                             | (Becker <i>et al.</i> , 1996)    |
| <i>ssa1-45</i>                                          | <i>MAT<math>\alpha</math>, his3-11,15, leu2-3,112, ura3-52. trp1-<math>\Delta</math>1, lys2, ssa1-45, ssa2-1(LEU2), ssa3-1(TRP1), ssa4-2(LYS2)</i>                                                    | (Becker <i>et al.</i> , 1996)    |
| <i>KAR2</i>                                             | <i>MAT<math>\alpha</math> ura3-52, leu2-3,112, ade2-101</i>                                                                                                                                           | (Sanders <i>et al.</i> , 1992)   |
| <i>kar2-1</i>                                           | <i>MAT<math>\alpha</math>, kar2-1, ura3-52, leu2-3,112, ade2-101</i>                                                                                                                                  | (Brodsky <i>et al.</i> , 1999)   |
| <i>HLJ1 YDJ1</i>                                        | <i>MAT<math>\alpha</math>, ade2, his3, leu2, ura3, trp1</i>                                                                                                                                           | (Youker <i>et al.</i> , 2004)    |
| <i>hlj1<math>\Delta</math> ydj1-151</i>                 | <i>MAT<math>\alpha</math>, ade2, his3, leu2, ura3, trp1, can1-100, ydj1-2::HIS3 ydj1-151::LEU2 hlj1::TRP1</i>                                                                                         | (Youker <i>et al.</i> , 2004)    |
| <i>DOA10HRD1</i>                                        | <i>MAT<math>\alpha</math>, his3-<math>\Delta</math>200, leu2-3,112, ura3-52, lys2-801, trp1-1, gal2</i>                                                                                               | (Huyer <i>et al.</i> , 2004)     |
| <i>doa10<math>\Delta</math></i>                         | <i>MAT<math>\alpha</math>, his3-<math>\Delta</math>200, leu2-3,112, ura3-52, lys2-801, trp1-1, gal2, doa10<math>\Delta</math>::HIS3</i>                                                               | (Huyer <i>et al.</i> , 2004)     |
| <i>hrd1<math>\Delta</math></i>                          | <i>MAT<math>\alpha</math>, his3-<math>\Delta</math>200, leu2-3,112, ura3-52, lys2-801, trp1-1, gal2, hrd1<math>\Delta</math>::LEU2</i>                                                                | (Huyer <i>et al.</i> , 2004)     |
| <i>doa10<math>\Delta</math> hrd1<math>\Delta</math></i> | <i>MAT<math>\alpha</math>, his3-<math>\Delta</math>200, leu2-3,112, ura3-52, lys2-801, trp1-1, gal2 doa10<math>\Delta</math>::HIS3, hrd1<math>\Delta</math>::LEU2</i>                                 | (Huyer <i>et al.</i> , 2004)     |
| <i>cdc48-2</i>                                          | Back-crossed 3X to BY4742                                                                                                                                                                             | (Moir <i>et al.</i> , 1982)      |

**Supplemental Table 4 Primers and Plasmids used in this study**

| <b>Primer/Plas mid</b> | <b>Sequence/Genotype</b>                                                                                                                                                               | <b>Reference</b> |
|------------------------|----------------------------------------------------------------------------------------------------------------------------------------------------------------------------------------|------------------|
| <i>Primer</i>          |                                                                                                                                                                                        |                  |
| oKN53                  | GCGCCGCGGTTATTCACTATGCGTTAT                                                                                                                                                            | This study       |
| oKN54                  | GATCATCAAGGAAGT                                                                                                                                                                        | This study       |
| oKN57                  | GATGTGCATCCAACCTGTTAG                                                                                                                                                                  | This study       |
| oKN58                  | CCCGATATAAGTAGAGGCCAA                                                                                                                                                                  | This study       |
| oKN85                  | CATACCCGATATAAGTAGA                                                                                                                                                                    | This study       |
| oCG06                  | AGGCAAAATTTAAATAGA                                                                                                                                                                     | This study       |
| oCG07                  | TCTATTTTAATTTTGCCT                                                                                                                                                                     | This study       |
| oCG12                  | CCCCAACTAGTACAGAGGTCAGGTGGTCCAGGTGCTGCTGCTGCT<br>TTGGCTTTGGCTTTGGCTTTGGCTTTGGCTTTGGCTGCTGCTGCTG<br>GTCCAGGTGGTATGCACATCATACCCGATATA                                                    | This study       |
| oCG13                  | TATATCGGGTATGATGTGCATACCACCTGGACCAGCAGCAGCAGC<br>CAAAGCCAAAGCCAAAGCCAAAGCCAAAGCCAAAGCCAAAGCAGCAGCAGC<br>ACCTGGACCACCTGACCTCTGTACTAGTTGGGG                                              | This study       |
| oCG15                  | CCCCAACTAGTACAGAGGTCAATGCACATCATACCCGATATA                                                                                                                                             | This study       |
| oCG16                  | TATATCGGGTATGATGTGCATTGACCTCTGTACTAGTTGGGG                                                                                                                                             | This study       |
| oCG26                  | ATGGTTATAACGCATAGTGAACAAATGATGAGGTCTTGTAACCTCGAT<br>TGCAGTTCTTAAAGATGGTAAAGTGGTTGAGCGAGGTAACCTTCGAC<br>ACTTTATATAATAATCGCGGGGAATTATTCCAAATTGTTTCCAACCA<br>AAGCAGTTAACCGCGGTGGAGCTCCAAT | This study       |
| oCG27                  | ATTGGAGCTCCACCGCGGTTAACTGCTTTGGTTGGAAACAATTTGG<br>AATAATTCCTCGGATTATTATATAAAGTGTGCAAGTTACCTCGCTC<br>AACCACCTTACCATCTTTAAGAAGTCAATCGAGTTACAAGACCTCA<br>TCATTTGTTCACTATGCGTTATAACCAT     | This study       |
| oCG37                  | TACGTGAACATACGGAATGACTCTATCCTGACGGGCAGAGTG                                                                                                                                             | This study       |
| oCG38                  | CACTCTGCCCGTCAGGATAGAGTCATTCCGTATGTTACGTA                                                                                                                                              | This study       |
| oCG39                  | TACGTGAACATACGGAATGACGGTGGTCCAGGTGCTGCTGCTGCT<br>TTGGCTTTGGCTTTGGCTTTGGCTTTGGCTTTGGCTGCTGCTGCTG                                                                                        | This study       |

|                |                                                                                                                                            |                                    |
|----------------|--------------------------------------------------------------------------------------------------------------------------------------------|------------------------------------|
|                | GTCCAGGTGGTTCTATCCTGACGGGCAGAGTG                                                                                                           |                                    |
| oCG40          | CACTCTGCCCGTCAGGATAGAACCACCTGGACCAGCAGCAGCAGC<br>CAAAGCCAAAGCCAAAGCCAAAGCCAAAGCCAAAGCCAAAGCAGCAGCAGC<br>ACCTGGACCACCGTCATTCCGTATGTTCCACGTA | This study                         |
| oCG77          | TACGTGAACATACGGAATGACGGTGGTCCAGGTAATGCTGCTGCT<br>GCTTTATTGTTATTGTTATTGTTATTGTTATTGGCTGCTGCTAATGGT<br>CCAGGTGGTTCTATCCTGACGGGCAGAGTG        | This study                         |
| oCG78          | CACTCTGCCCGTCAGGATAGAACCACCTGGACCATTAGCAGCAGC<br>CAATAACAATAACAATAACAATAACAATAAAGCAGCAGCAGCATTAC<br>CTGGACCACCGTCATTCCGTATGTTCCACGTA       | This study                         |
| oCG79          | TACGTGAACATACGGAATGACTACAGGCTGTTAATGATAATGATAAT<br>AGCTTTGGTGGCATTAGCTCTAGTGTTAGCAATTACTTCTATCCTGA<br>CGGGCAGAGTG                          | This study                         |
| oCG80          | CACTCTGCCCGTCAGGATAGAAGTAATTGCTAACACTAGAGCTAAT<br>GCCACCAAAGCTATTATCATTATCATTAAACAGCCTGTAGTCATTCCG<br>TATGTTCCACGTA                        | This study                         |
| oCG81          | TACGTGAACATACGGAATGACGGTGGTCCAGGTTTATTGTTATTGTT<br>ATTGTTATTGTTATTGTTATTGTTATTGTTATTGTTATTGTTAGGTCCA<br>GGTGGTTCTATCCTGACGGGCAGAGTG        | This study                         |
| oCG82          | CACTCTGCCCGTCAGGATAGAACCACCTGGACCTAACAATAACAAT<br>ACAATAACAATAACAATAACAATAACAATAACAATAACAATAAACCT<br>GGACCACCGTCATTCCGTATGTTCCACGTA        | This study                         |
| <b>Plasmid</b> |                                                                                                                                            |                                    |
| pSM1911        | 2 $\mu$ <i>URA3 P-PGK ste6-166-3HA</i>                                                                                                     | (Huyer <i>et al.</i> , 2004)       |
| pKN05          | 2 $\mu$ <i>URA3 ste6-166tm1-2NBD2-3HA</i>                                                                                                  | This study                         |
| pKN31          | 2 $\mu$ <i>HIS3 Pcup1-mycUb-Tcyc1</i>                                                                                                      | (Nakatsukasa <i>et al.</i> , 2008) |
| pCG11          | 2 $\mu$ <i>URA3 ste6-166tm1-2(delete)NBD2-3HA</i>                                                                                          | This study                         |
| pCG12          | 2 $\mu$ <i>URA3 STE6tm1-2(<math>\Delta</math>G=0.31)NBD2-3HA</i>                                                                           | This study                         |
| pCG19          | 2 $\mu$ <i>URA3 STE6tm1-2(<math>\Delta</math>G=0.31)NBD2-3HA</i>                                                                           | This study                         |
| pCG27          | CENADH <i>ste6-166tm1-2(<math>\Delta</math>G=0.31)NBD2-3HA</i>                                                                             | This study                         |
| pCG29          | CENADH <i>STE6tm1-2(<math>\Delta</math>G=0.31)NBD2-3HA</i>                                                                                 | This study                         |



|       |                                                                              |            |
|-------|------------------------------------------------------------------------------|------------|
| pCG32 | 2 $\mu$ URA3 <i>STE6tm1</i> (delete)-2( $\Delta$ G=0.31)NBD2-3HA             | This study |
| pCG45 | 2 $\mu$ URA3 <i>STE6tm1</i> ( $\Delta$ G=-0.19)-2( $\Delta$ G=0.063)NBD2-3HA | This study |
| pCG78 | 2 $\mu$ URA3 <i>STE6tm1</i> ( $\Delta$ G=-1.07)-2( $\Delta$ G=0.063)NBD2-3HA | This study |
| pCG80 | 2 $\mu$ URA3 <i>STE6tm1</i> ( $\Delta$ G=-4.38)-2( $\Delta$ G=0.063)NBD2-3HA | This study |
| pCG82 | 2 $\mu$ URA3 <i>STE6tm1</i> ( $\Delta$ G=-7.15)-2( $\Delta$ G=0.063)NBD2-3HA | This study |

>Chimera N\*

MNFLSFKTTKHYHIFRYVNIRNDYRLLMIMIIGTVATGLVPAITSIILTGRVFDLLSVFVANGSHQGLDLGRIFYPYDVPDYAGYPYDVP  
DYAGSYPYDVPDYAAQC GPD PQLVQRSMVMALGAASVPVMWLSLTSWMHIPDISRGQRAASWIYRILDEKHNTLEVENNNARTVGIAG  
HTYHGKEKKPIVSIQNLTFAYP SAPTAFVYKMNMFDMFCGQTLGIIGESGTGKSTLVLLLTCLYNCEVGKIKIDGTDVNDWNLTSLRKE  
ISVVEQKPLL FNGTIRDNLTYGLQDEILEIEMYDALKYVGIHDFVISSPQGLDTRIDTTLSSGGQAQRLCIARALLRKSILILDECTS  
ALDSVSSSIINEIVKKGPPALLTMVITHSE

>Chimera A\* $\Delta$ G=0.31

MNFLSFKTTKHYHIFRYVNIRNDYRLLMIMIIGTVATGLVPAITSIILTGRVFDLLSVFVANGSHQGLDLGRIFYPYDVPDYAGYPYDVP  
DYAGSYPYDVPDYAAQC GPD PQLVQRSGGPGAAAALALALALALALALAAAAGPGGMHIIPDISRGQRAASWIYRILDEKHNTLEVENNNA  
RTVGIAGHTYHGKEKKPIVSIQNLTFAYP SAPTAFVYKMNMFDMFCGQTLGIIGESGTGKSTLVLLLTCLYNCEVGKIKIDGTDVNDWN  
LTSLRKEISVVEQKPLL FNGTIRDNLTYGLQDEILEIEMYDALKYVGIHDFVISSPQGLDTRIDTTLSSGGQAQRLCIARALLRKSIL  
ILDECTSALDSVSSSIINEIVKKGPPALLTMVITHSE

>Chimera A\* $\Delta$ G=-0.19

MNFLSFKTTKHYHIFRYVNIRNDGGPGAAAALALALALALALALAAAAGPGGSILTGRVFDLLSVFVANGSHQGLDLGRIFYPYDVPDYAG  
YPYDVPDYAGSYPYDVPDYAAQC GPD PQLVQRSGGPGAAAALALALALALALALAAAAGPGGMHIIPDISRGQRAASWIYRILDEKHNTLE  
VENNNARTVGIAGHTYHGKEKKPIVSIQNLTFAYP SAPTAFVYKMNMFDMFCGQTLGIIGESGTGKSTLVLLLTCLYNCEVGKIKIDGT  
DVNDWNLTSLRKEISVVEQKPLL FNGTIRDNLTYGLQDEILEIEMYDALKYVGIHDFVISSPQGLDTRIDTTLSSGGQAQRLCIARALL  
RKSILILDECTSALDSVSSSIINEIVKKGPPALLTMVITHSE

>Chimera A\* $\Delta$ G=-1.07

MNFLSFKTTKHYHIFRYVNIRNDGGPGNAAAALLLLLLLLLLAAANGPGGSILTGRVFDLLSVFVANGSHQGLDLGRIFYPYDVPDYAG  
YPYDVPDYAGSYPYDVPDYAAQC GPD PQLVQRSGGPGAAAALALALALALALALAAAAGPGGMHIIPDISRGQRAASWIYRILDEKHNTLE  
VENNNARTVGIAGHTYHGKEKKPIVSIQNLTFA YPSAP TAFVYKMNMFDMFCGQTLGIIGESGTGKSTLVLLLTKLYNCEV GKIKIDGT  
DVNDWNLTSLRKEISVVEQKPLLFNGTIRDNLTYGLQDEILEIEMYDALKYVGIHDFVISSPQGLDTRIDTTLLSGGQAQRLCIARALL  
RKS KILILDECTSALDSVSSSIINEIVKKGPPALLTMVITHSE

>Chimera A\* $\Delta G=-4.38$

MNFLSFKTTKHYHIFRYVNIRNDYRLLMIMI IALVALALVLAITSILTGRVFDLLSVFVANGSHQGLDLGRIFYPYDVPDYAGYPYDVP  
DYAGSYPYDVPDYAAQC GPD PQLVQRSGGPGAAAALALALALALALALAAAAGPGGMHIIPDISRGQRAASWIYRILDEKHNTLEVENNNA  
RTVGIAGHTYHGKEKKPIVSIQNLTFA YPSAP TAFVYKMNMFDMFCGQTLGIIGESGTGKSTLVLLLTKLYNCEV GKIKIDGT  
DVNDWNLTSLRKEISVVEQKPLLFNGTIRDNLTYGLQDEILEIEMYDALKYVGIHDFVISSPQGLDTRIDTTLLSGGQAQRLCIARALLRKS  
KILILDECTSALDSVSSSIINEIVKKGPPALLTMVITHSE

>Chimera A\* $\Delta G=-7.15$

MNFLSFKTTKHYHIFRYVNIRNDGGPGLLLLLLLLLLLLLLLLLLLLLGGGILTGRVFDLLSVFVANGSHQGLDLGRIFYPYDVPDYAGY  
PYDVPDYAGSYPYDVPDYAAQC GPD PQLVQRSGGPGAAAALALALALALALALAAAAGPGGMHIIPDISRGQRAASWIYRILDEKHNTLE  
VENNNARTVGIAGHTYHGKEKKPIVSIQNLTFA YPSAP TAFVYKMNMFDMFCGQTLGIIGESGTGKSTLVLLLTKLYNCEV GKIKIDGT  
DVNDWNLTSLRKEISVVEQKPLLFNGTIRDNLTYGLQDEILEIEMYDALKYVGIHDFVISSPQGLDTRIDTTLLSGGQAQRLCIARALLR  
KSKILILDECTSALDSVSSSIINEIVKKGPPALLTMVITHSE

>Chimera A $\Delta G=0.31$

MNFLSFKTTKHYHIFRYVNIRNDYRLLMIMI IGT VATGLVPAITSILTGRVFDLLSVFVANGSHQGLDLGRIFYPYDVPDYAGYPYDVP  
DYAGSYPYDVPDYAAQC GPD PQLVQRSGGPGAAAALALALALALALALAAAAGPGGMHIIPDISRGQRAASWIYRILDEKHNTLEVENNNA  
RTVGIAGHTYHGKEKKPIVSIQNLTFA YPSAP TAFVYKMNMFDMFCGQTLGIIGESGTGKSTLVLLLTKLYNCEV GKIKIDGT  
DVNDWNLTSLRKEISVVEQKPLLFNGTIRDNLTYGLQDEILEIEMYDALKYVGIHDFVISSPQGLDTRIDTTLLSGGQAQRLCIARALLRKS  
KILILDECTSALDSVSSSIINEIVKKGPPALLTMVITHSEQMMRSCNSIAVLKDGKVVERGNFDTLYNNRGELFQIVSNQSS

>pSM1911 Ste6p\*

MNFLSFKTTKHYHIFRYVNIRNDYRLLMIMI IGT VATGLVPAITSILTGRVFDLLSVFVANGSHQGLDLGRIFYPYDVPDYAGYPYDVP  
DYAGSYPYDVPDYAAQC GPD PQLVQRSMVMALGAASVPMWLSLTSWMHIGERQGFRI RSQILEAYLEEKPM EWYDNNEKLLGDFTQI  
NRCVEELRSSAEASAITFQNLVAICALLGTSFYYSWSLTLIILCSSPIITFFAVVFSRMIVHYSEKENSETSKAAQLLTWSMNAQLV  
RLYCTQRLERKKFKEIILNCNTFFIKSCFFVAANAGILRFLTLTMFVQGFWFGSAMIKKGKLNINDVITCFHSCIMLGSTLNNTLHQIV

VLQKGGVAMEKIMTLLKDGSKRNPLNKTVAHQFPLDYATSDLTFANVSFSYPSRPSEAVLKNVSLNFSAGQFTFIVGKSGSGKSTLSNL  
LLRFYDGYNGSISINGHNIQTIDQKLLIENITVVEQRCTLFNDTLRKNILLGSTDSVRNADCSTNENRHLIKDACQMALLDRFILDLPD  
GLETLIGTGGVTLSSGGQQQRVAIARAFIRDTPILFLDEAVSALDIVHRNLLMKAIRHWRKGGKTTIILTHELSQIESDDYLYLMKEGEV  
ESGTQSELLADPTTTFSTWYHLQNDYSDAKTIVDTETEEKSIHTVESFNSQLETPKLGSCLSNLGYDETDQLSFYEAIIYQKRSNVRTRR  
VKVEEENIGYALKQQKNTESSSTGPQLLSIIQIIKRMIKSIRYKKILILGLLCSLIAGATNPVFSYTFSLLEGIVPSTDGKTGSSHYLA  
KWSLLVLGVAAADGIFNFAGKGFLLDCCSEYWMDLRNEVMEKLRKNMDWFSGENNKASEISALVLNDRDLRSLVSEFLSAMTSFVTV  
STIGLIWALVSGWKLSLVCISMFLPIIIIFSAIYGGILQKCE TDYKTSVAQLENCLYQIVTNIKTIKCLQAEFHFQLTYHDLKIKMQQIA  
SKRAIATGFGISMTNMIVMCIQAI IYYYGLKLVMIHEYTSKEMFTTFTLLLFTIMSC TSLVSQIPDISRGQRAASWIYRILDEKHNTLE  
VENNNARTVGIAGHTYHGKEKKPIVSIQNLTFAYPSAPTAFVYKNMNFDMFCGQTLGIIGESGTGKSTLVLLLTCLYNCEVGKIKIDGT  
DVNDWNLTSLRKEISVVEQKPLLFNGTIRDNLTYGLQDEILEIEMYDALKYVGIHDFVISSPQGLDTRIDTTLLSGGQAQRLCIARALL  
RKSILILDECTSALDSVSSSIINEIVKKGPPALLTMVITHSE

### Supplemental References

Becker, J., Walter, W., Yan, W., and Craig, E.A. (1996). Functional interaction of cytosolic hsp70 and a DnaJ-related protein, Ydj1p, in protein translocation in vivo. *Mol Cell Biol* 16, 4378-4386.

Brodsky, J.L., Werner, E.D., Dubas, M.E., Goekeler, J.L., Kruse, K.B., and McCracken, A.A. (1999). The requirement for molecular chaperones during endoplasmic reticulum-associated protein degradation demonstrates that protein export and import are mechanistically distinct. *Journal of Biological Chemistry* 274, 3453-3460.

Huyer, G., Piluek, W.F., Fansler, Z., Kreft, S.G., Hochstrasser, M., Brodsky, J.L., and Michaelis, S. (2004). Distinct Machinery Is Required in *Saccharomyces cerevisiae* for the Endoplasmic Reticulum-associated Degradation of a Multispanning Membrane Protein and a Soluble Luminal Protein. *Journal of Biological Chemistry* 279, 38369-38378.

Latterich, M., Frohlich, K.U., and Schekman, R. (1995). Membrane fusion and the cell cycle: Cdc48p participates in the fusion of ER membranes. *Cell* 82, 885-893.

Moir, D., Stewart, S.E., Osmond, B.C., and Botstein, D. (1982). COLD-SENSITIVE CELL-DIVISION-CYCLE MUTANTS OF YEAST: ISOLATION, PROPERTIES, AND PSEUDOREVERSION STUDIES. *Genetics* 100, 547-563.

Nakatsukasa, K., Huyer, G., Michaelis, S., and Brodsky, J.L. (2008). Dissecting the ER-associated degradation of a misfolded polytopic membrane protein. *Cell* 132, 101-112.

Sanders, S.L., Whitfield, K.M., Vogel, J.P., Rose, M.D., and Schekman, R.W. (1992). Sec61p and BiP directly facilitate polypeptide translocation into the ER. *Cell* 69, 353-365.

Winzeler, E.A., Shoemaker, D.D., Astromoff, A., Liang, H., Anderson, K., Andre, B., Bangham, R., Benito, R., Boeke, J.D., Bussey, H., Chu, A.M., Connelly, C., Davis, K., Dietrich, F., Dow, S.W., El Bakkoury, M., Foury, F., Friend, S.H., Gentalen, E., Giaever, G., Hegemann, J.H., Jones, T., Laub, M., Liao, H., Liebundguth, N., Lockhart, D.J., Lucau-Danila, A., Lussier, M., M'Rabet, N., Menard, P., Mittmann, M., Pai, C., Rebischung, C., Revuelta, J.L., Riles, L., Roberts, C.J., Ross-MacDonald, P., Scherens, B., Snyder, M., Sookhai-Mahadeo, S., Storms, R.K., Veronneau, S., Voet, M., Volckaert, G., Ward, T.R., Wysocki, R., Yen, G.S., Yu, K., Zimmermann, K., Philippsen, P., Johnston, M., and Davis, R.W. (1999). Functional characterization of the *S. cerevisiae* genome by gene deletion and parallel analysis. *Science* 285, 901-906.

Youker, R.T., Walsh, P., Beilharz, T., Lithgow, T., and Brodsky, J.L. (2004). Distinct roles for the Hsp40 and Hsp90 molecular chaperones during cystic fibrosis transmembrane conductance regulator degradation in yeast. *Mol Biol Cell* 15, 4787-4797.
